# Supplementary material
Source: PubMed Central journal article supplement (PMC3880594)
Supplement: NIHMS536742-supplement-2_si_001.pdf [file NIHMS536742-supplement-2_si_001.pdf]

## Supporting Information

### **Oridonin Ring A-Based Diverse Constructions of Enone Functionality: Identification of Dienone Analogues Effective for Highly Aggressive Breast Cancer by Inducing Apoptosis**

Chunyong Ding,<sup>†,‡</sup> Yusong Zhang,<sup>‡,§,‡</sup> Haijun Chen,<sup>†</sup> Zhengduo Yang,<sup>§</sup> Christopher Wild,<sup>†</sup> Na Ye,<sup>†</sup> Corbin D. Ester,<sup>§</sup> Ailian Xiong,<sup>§</sup> Mark A. White,<sup>§</sup> Qiang Shen,<sup>§,\*</sup> and Jia Zhou<sup>†,\*</sup>

<sup>†</sup>*Chemical Biology Program, Department of Pharmacology and Toxicology, University of Texas Medical Branch, Galveston, Texas 77555, United States. E-mail: [jizhou@utmb.edu](mailto:jizhou@utmb.edu)*

<sup>‡</sup>*Department of Oncology, the Second Affiliated Hospital of Soochow University, Suzhou, Jiangsu, 215004, China*

<sup>§</sup>*Department of Clinical Cancer Prevention, Division of Cancer Prevention and Population Sciences, The University of Texas M.D. Anderson Cancer Center, Houston, Texas 77030, United States*

<sup>§</sup>*Sealy Center for Structural Biology & Molecular Biophysics, University of Texas Medical Branch, Galveston, TX 77555, United States*

### **Table of Contents**

**Figure 1S.** Growth inhibitory effects of adriamycin on MCF-7 and MCF-7/ADR cells ---- **S2**

**Copies of NMR data** ----- **S3-29**

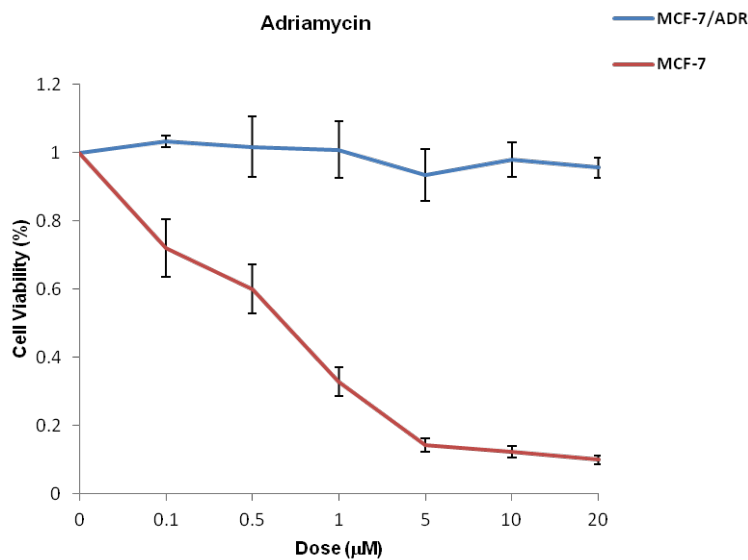

**Figure 1S.** Growth inhibitory effects of adriamycin on MCF-7 and MCF-7/ADR cells. These cells were treated with varying concentrations of adriamycin for 48 h. Values are mean  $\pm$  SE of three independent experiments. Statistical significance was determined using Student's t-test.

**Maintenance of MCF-7/ADR resistant cells.** MCF-7/ADR cells were obtained from Michael Zhu (University of Texas Houston Health Science Center, Houston, TX 77030). The resistance was maintained by exposure of cells to 10  $\mu$ M of adriamycin for 48 h every 8 weeks. As shown in Figure 1S, adriamycin dose-dependently suppressed the growth of MCF-7 cells at the concentrations from 0.1  $\mu$ M to 20  $\mu$ M; on the contrary, it displayed no growth inhibitory activity against MCF-7/ADR cells at the same concentrations. These results demonstrated that MCF-7/ADR cells for assays are adriamycin-resistant.

# Copies of NMR spectra

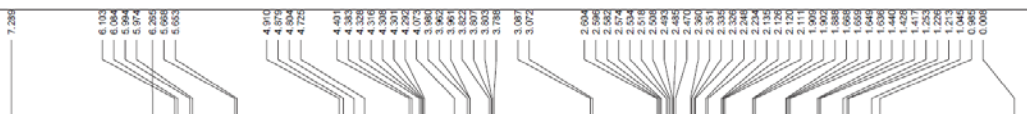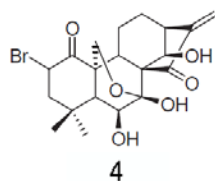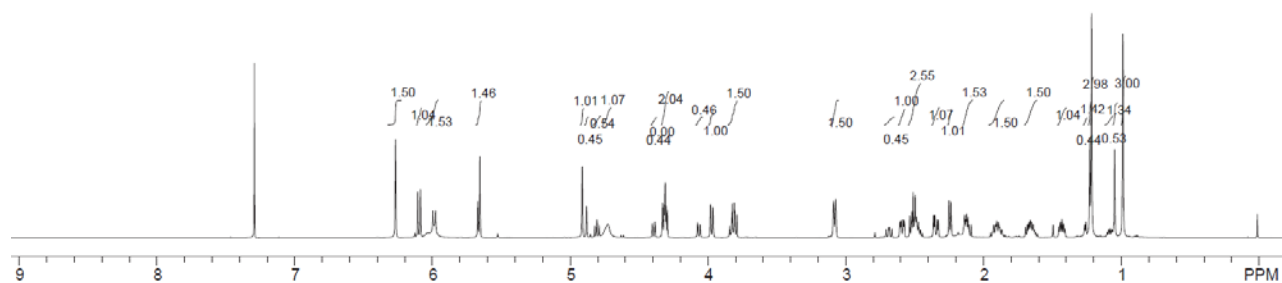

|              |              |             |                                              |         |              |                  |
|--------------|--------------|-------------|----------------------------------------------|---------|--------------|------------------|
| spectr_CDCl3 |              |             | USER: zhou -- DATE: Thu Jun 28 20:37:51 2012 |         |              |                  |
| F1: 599.378  | SW1: 12336   |             | OF1: 2998.4                                  |         | PTS1d: 65536 |                  |
| EX: zg30     | PW: 8.0 usec | PD: 1.0 sec | NA: 1                                        | LB: 0.0 |              | WinNuts - Spdata |

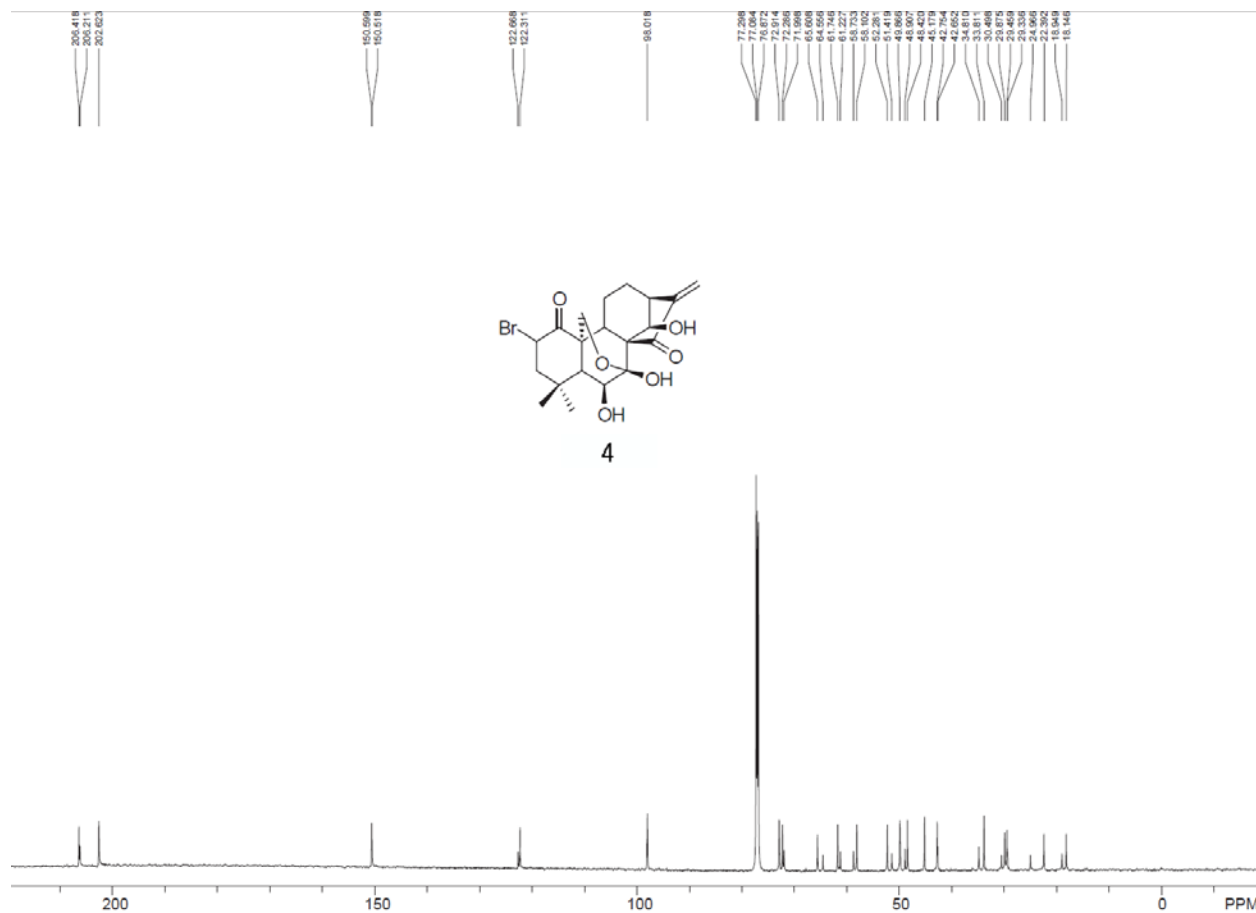

|              |               |                                              |              |         |                   |
|--------------|---------------|----------------------------------------------|--------------|---------|-------------------|
| spectr_CDCl3 |               | USER: zhou -- DATE: Thu Jun 28 20:42:34 2012 |              |         |                   |
| F1: 150.728  | SW1: 36058    | OE1: 15074.2                                 | PTS1d: 32768 |         |                   |
| EX: zgig30   | PW: 12.0 usec | PD: 1.5 sec                                  | NA: 129      | LB: 0.0 | WinNuts - \$pdata |

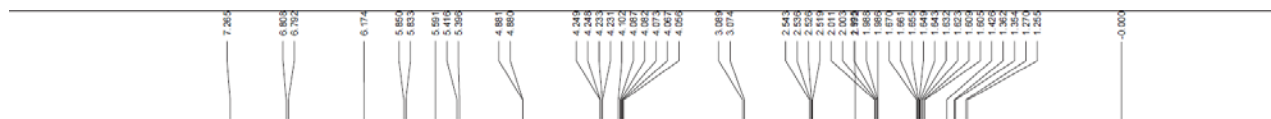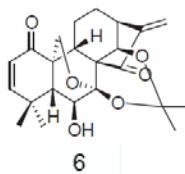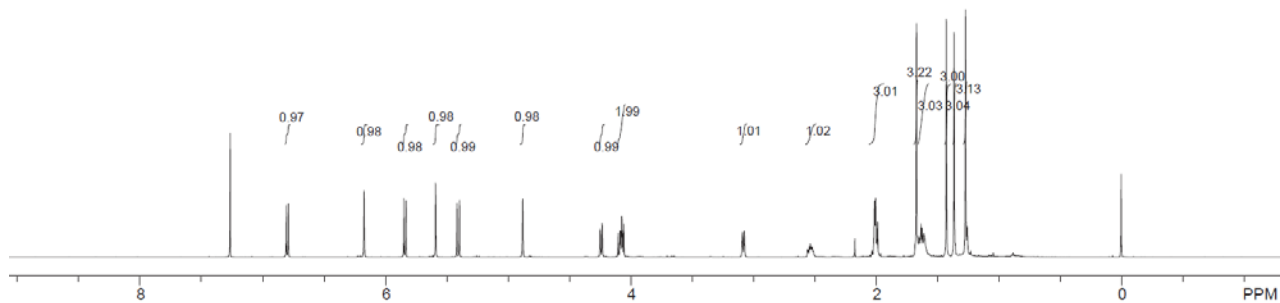

|                          |              |             |             |         |                                              |
|--------------------------|--------------|-------------|-------------|---------|----------------------------------------------|
| spect. CDCl <sub>3</sub> |              |             |             |         | USER: zhou -- DATE: Fri Jun 15 16:41:27 2012 |
| F1: 599.378              | SW1: 123336  |             | OF1: 2982.5 |         | PTS1d: 65536                                 |
| EX: zg30                 | PW: 8.0 usec | PD: 1.0 sec | NA: 1       | LB: 0.0 | WinNuts - Spdata                             |

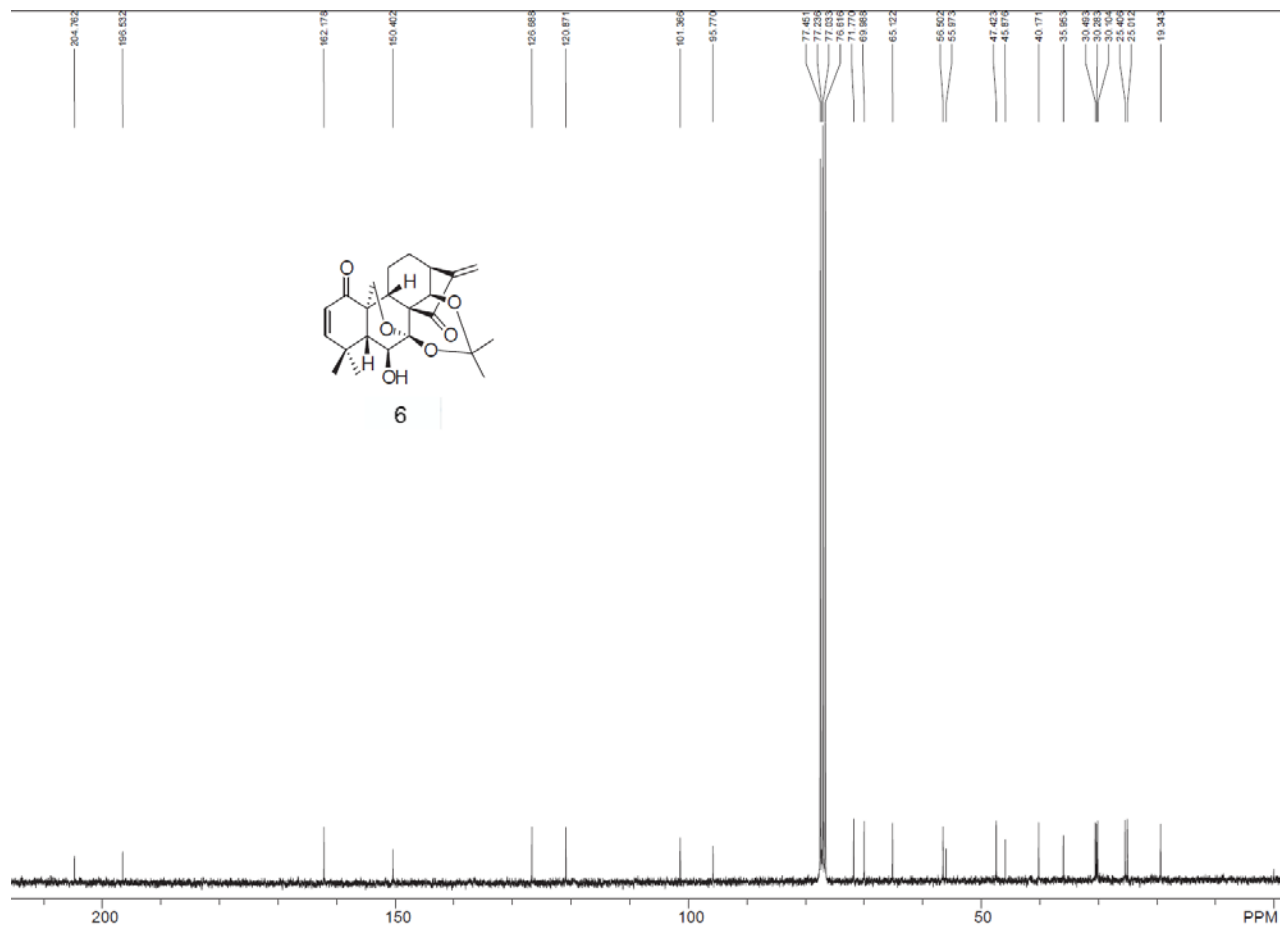

|              |              |             |              |         |  |                                             |
|--------------|--------------|-------------|--------------|---------|--|---------------------------------------------|
| spect. CDCl3 |              |             |              |         |  | USER: nmr -- DATE: Mon Jun 11 17:20:16 2012 |
| F1: 75.480   | SW1: 29762   |             | OF1: 12579.6 |         |  | PTS1d: 32768                                |
| EX: zgpg30   | PW: 8.0 usec | PD: 2.0 sec | NA: 2560     | LB: 0.0 |  | WinNuts - Spdata                            |

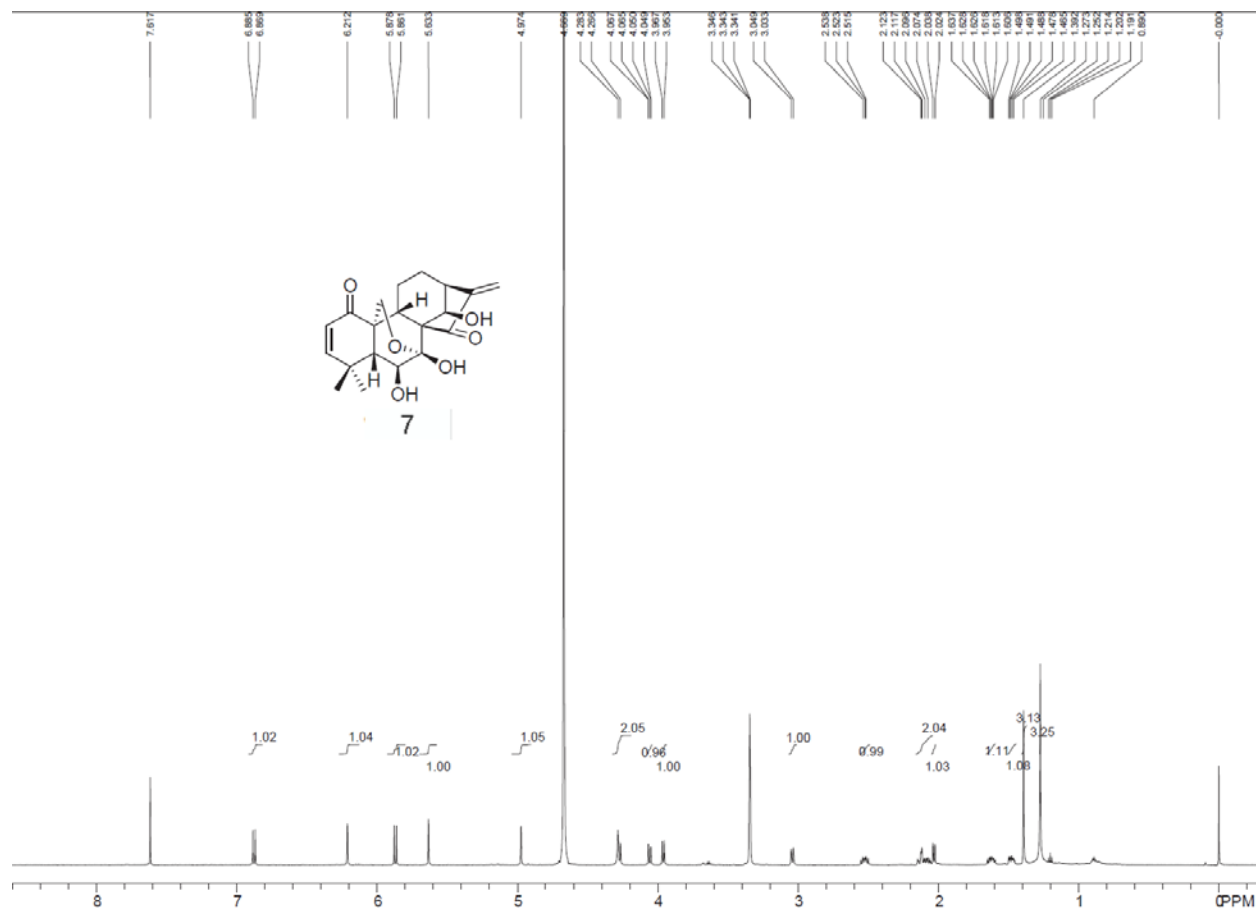

spect. MeOD. USER: zhou -- DATE: Wed Jun 20 20:35:15 2012  
 F1: 599.378 SW1: 123336 OF1: 3002.0 PTS1d: 65536  
 EX: zg30 PW: 8.0 usec PD: 1.0 sec NA: 1 LB: 0.0 WinNuts - Spdata

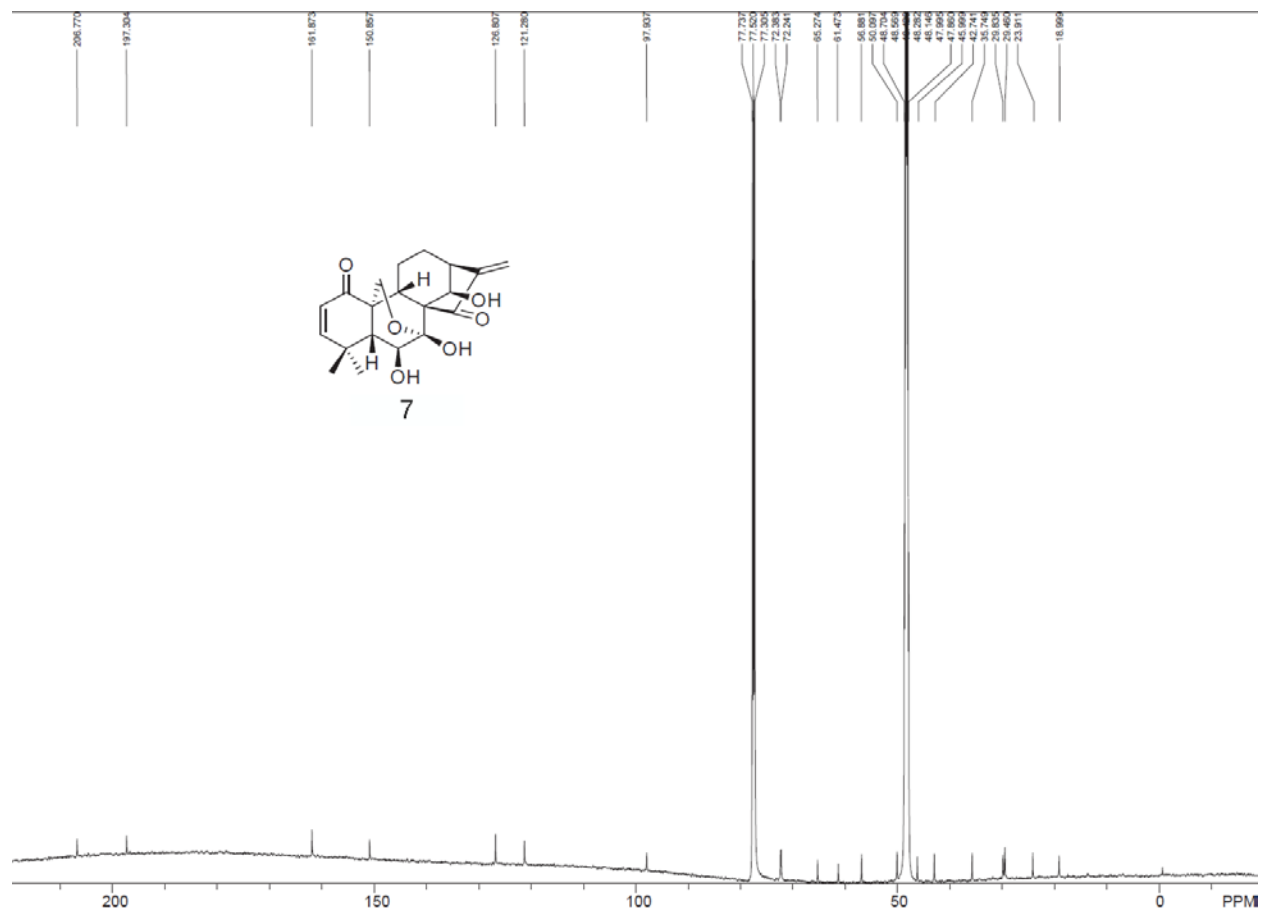

|              |               |              |              |                                              |                  |  |  |
|--------------|---------------|--------------|--------------|----------------------------------------------|------------------|--|--|
| spect. MeOD. |               |              |              | USER: zhou -- DATE: Wed Jun 20 20:40:41 2012 |                  |  |  |
| F1: 150.728  | SW1: 36058    | OF1: 15074.2 | PTS1d: 32768 |                                              |                  |  |  |
| EX: zgig30   | PW: 12.0 usec | PD: 1.5 sec  | NA: 2441     | LB: 0.0                                      | WinNuts - Spdata |  |  |



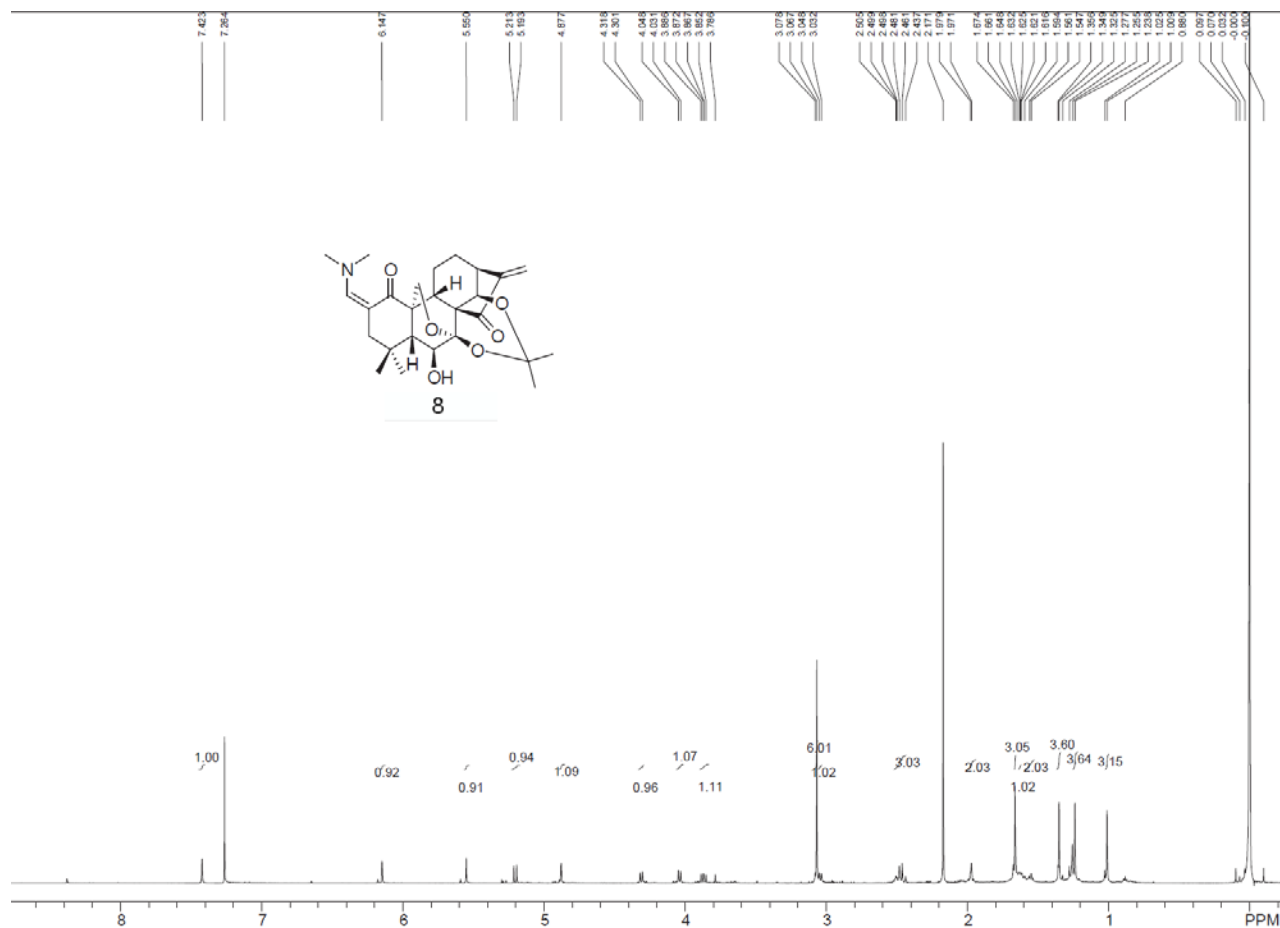

spectr. CDCl<sub>3</sub> USER: zhou -- DATE: Thu Jul 12 16:14:23 2012  
 F1: 599.378 SW1: 12336 OF1: 2981.6 PTS1d: 65536  
 EX: zg30 PW: 8.0 usec PD: 1.0 sec NA: 1 LB: 0.0 WinNuts - Spdata

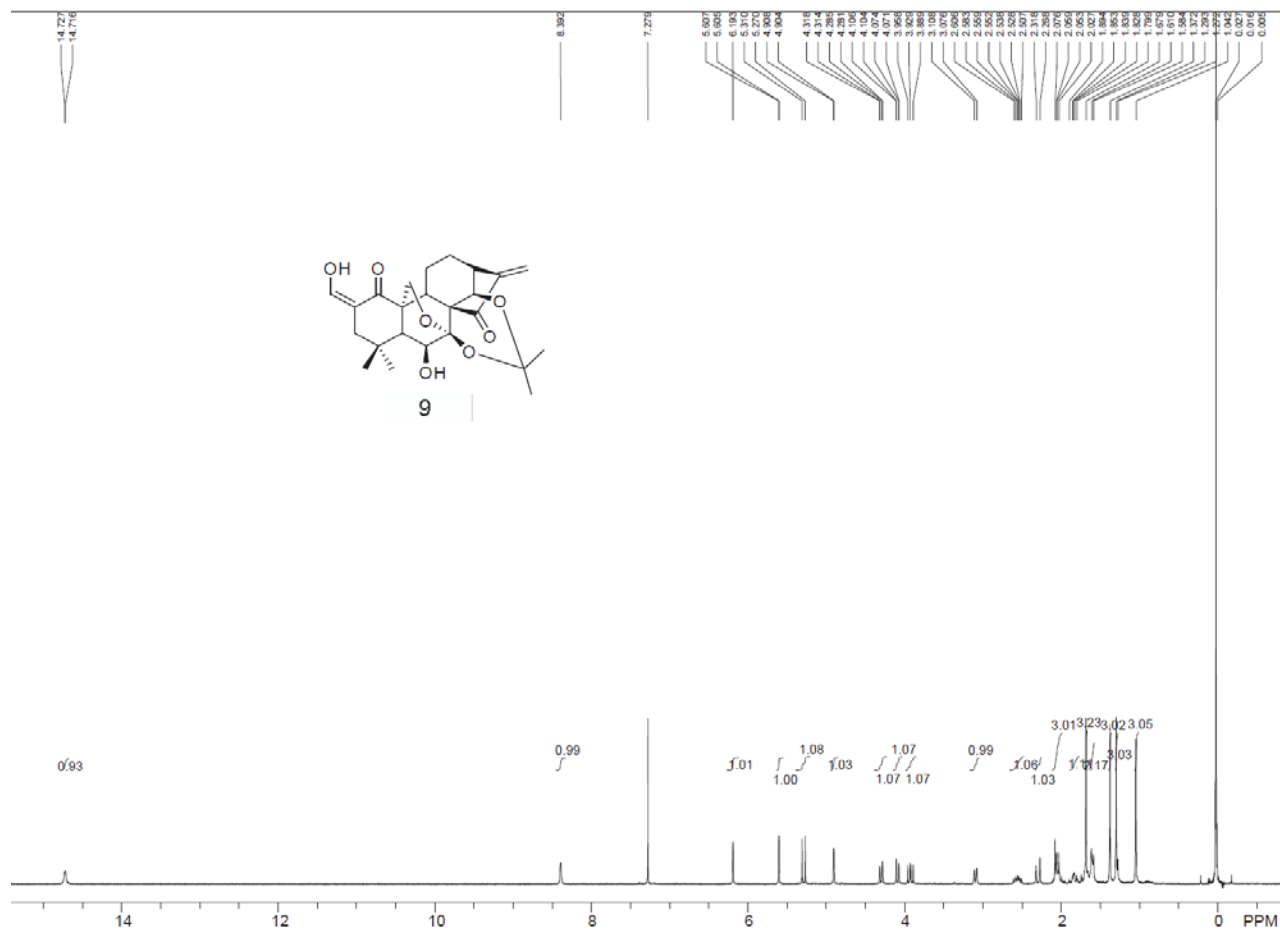

|              |                |             |              |                                             |                   |
|--------------|----------------|-------------|--------------|---------------------------------------------|-------------------|
| spect. CDCl3 |                |             |              | USER: nmr -- DATE: Fri Jul 20 20:05:41 2012 |                   |
| F1: 300.132  | SW1: 6188      | OF1: 1853.3 | PTS1d: 65536 |                                             |                   |
| EX: zg       | PW: 10.0 ussec | PD: 1.0 sec | NA: 1        | LB: 0.0                                     | WinNuts - \$pdata |

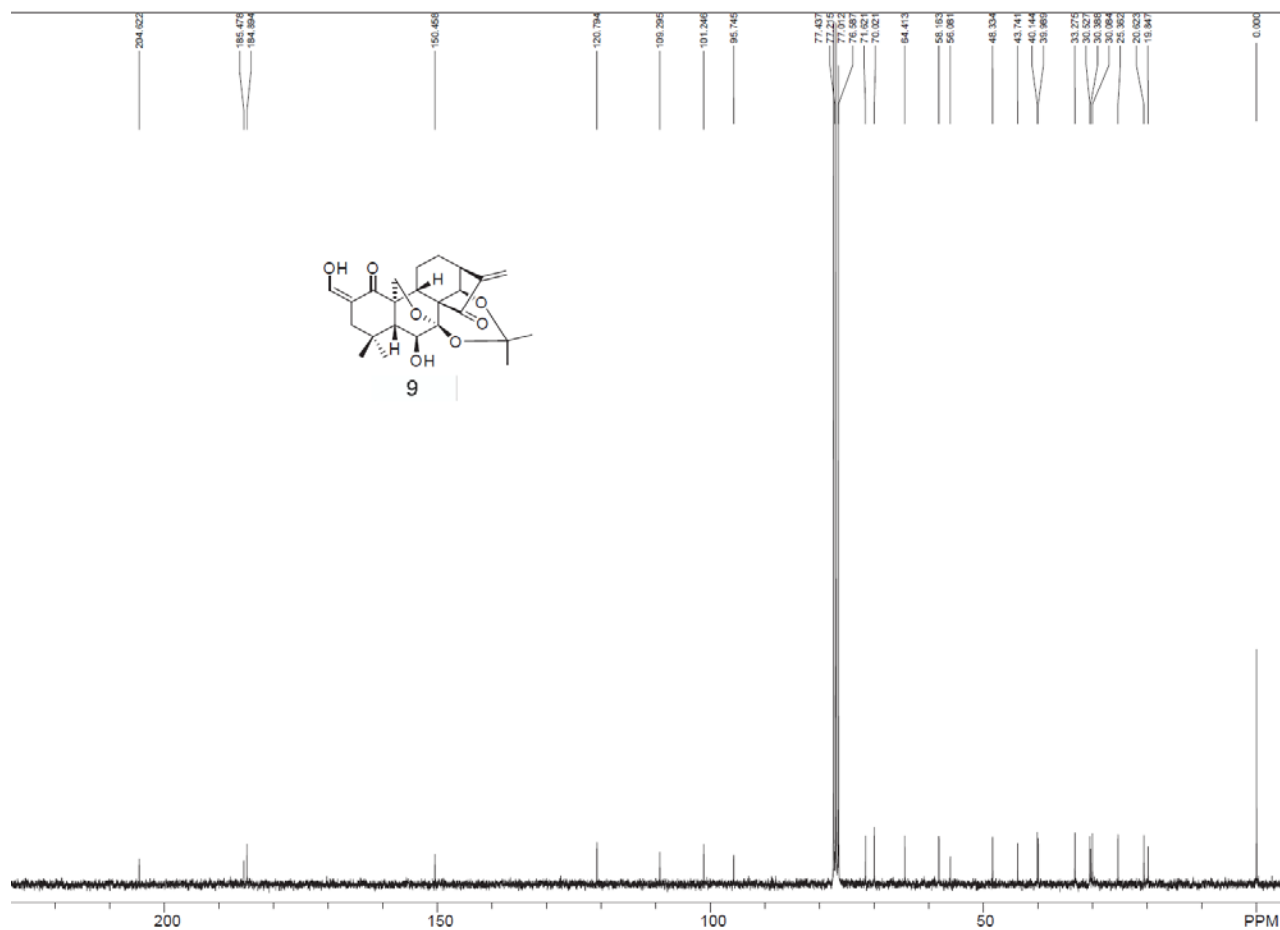

|               |              |              |                                             |         |                   |  |
|---------------|--------------|--------------|---------------------------------------------|---------|-------------------|--|
| .spect_CDCl3. |              |              | USER: nmr -- DATE: Fri Jul 20 20:11:27 2012 |         |                   |  |
| F1: 75.480    | SW1: 29762   | OF1: 12577.7 | PTSId: 32768                                |         |                   |  |
| EX: zgpg30    | PW: 8.0 usec | PD: 2.0 sec  | NA: 1211                                    | LB: 0.0 | WinNuts - \$pdata |  |

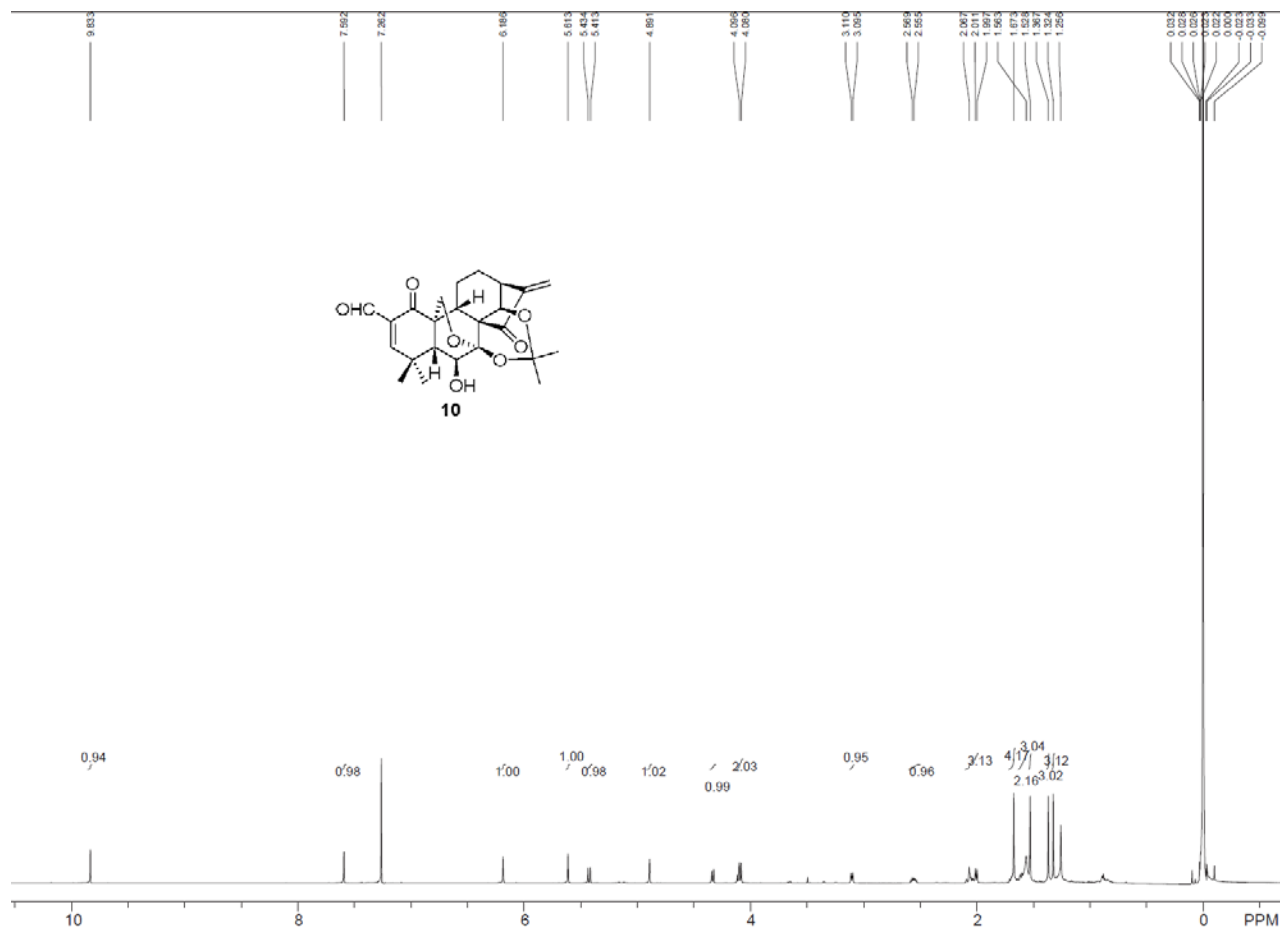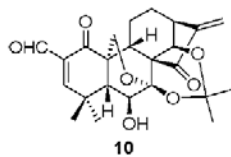

|              |              |             |             |         |                                              |
|--------------|--------------|-------------|-------------|---------|----------------------------------------------|
| spectr_CDC13 |              |             |             |         | USER: zhou -- DATE: Thu Jul 26 18:02:47 2012 |
| F1: 599.378  | SW1: 12336   |             | OF1: 2980.7 |         | PTSId: 65536                                 |
| EX: zg30     | PW: 8.0 usec | PD: 1.0 sec | NA: 16      | LB: 0.0 | WinNuts - Spdata                             |

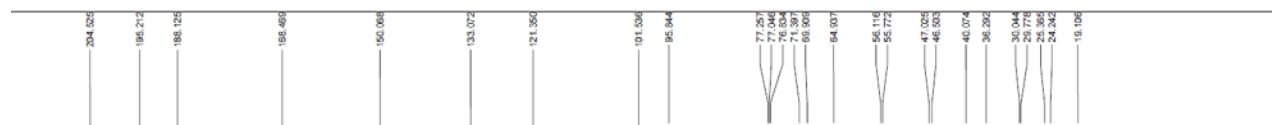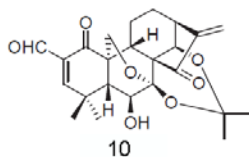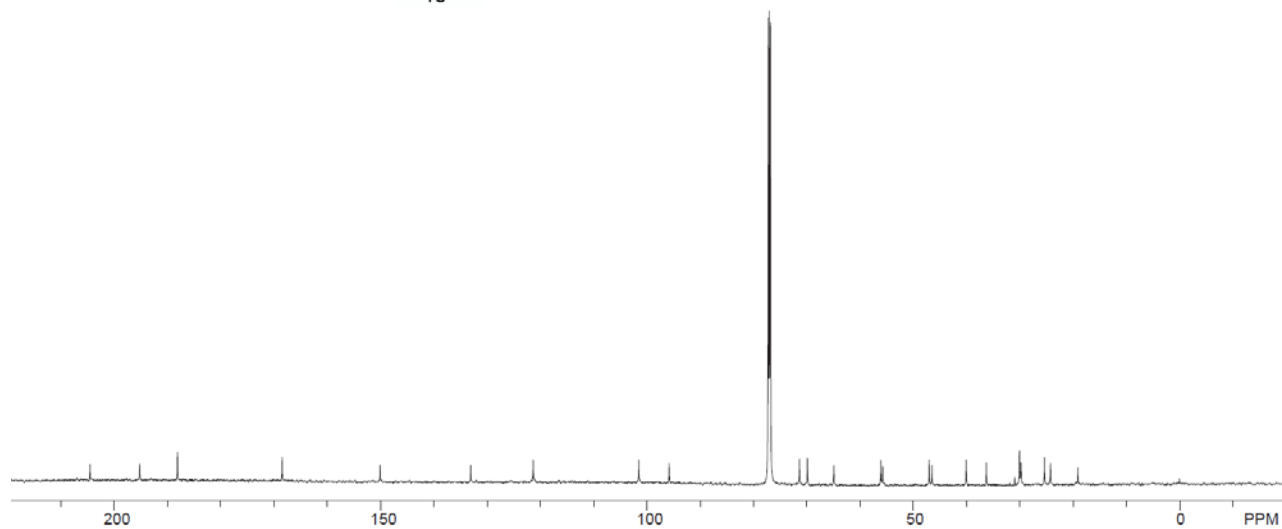

|                           |               |             |              |                                              |              |  |                  |
|---------------------------|---------------|-------------|--------------|----------------------------------------------|--------------|--|------------------|
| spectr. CDCl <sub>3</sub> |               |             |              | USER: zhou -- DATE: Thu Aug 09 20:47:11 2012 |              |  |                  |
| F1: 150.728               | SW1: 36058    |             | OFl: 15074.2 |                                              | PTS1d: 32768 |  |                  |
| EX: zgig30                | PW: 12.0 usec | PD: 1.5 sec | NA: 118      | LB: 0.0                                      |              |  | WinNuts - Spdata |

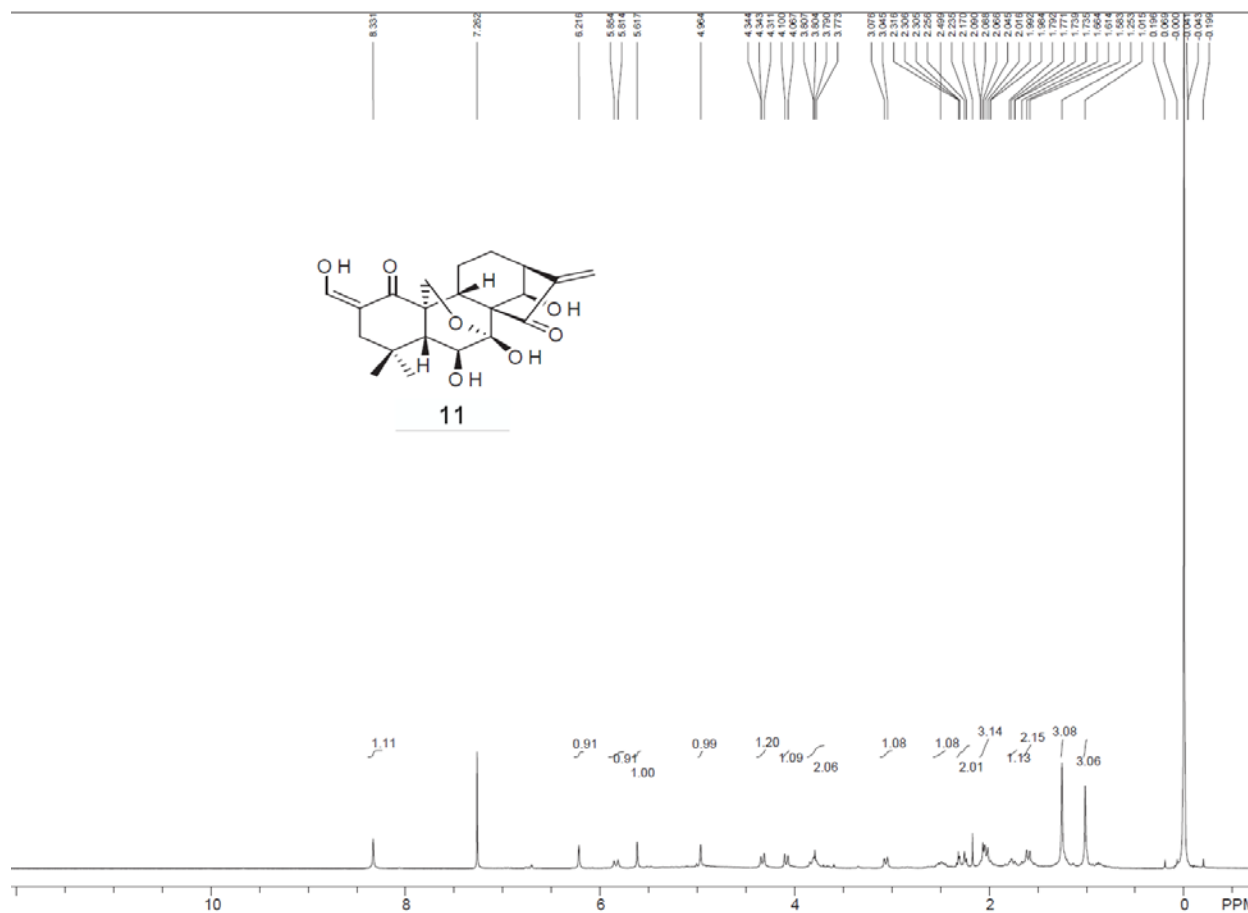

spect. CDCl<sub>3</sub> USER: nmr -- DATE: Mon Jul 16 14:21:14 2012  
 F1: 300.132 SWH: 6188 OF1: 1848.4 PTS1d: 65536  
 EX: zg PW: 10.0 usec PD: 1.0 sec NA: 10 LB: 0.0 WinNuts - Spdata

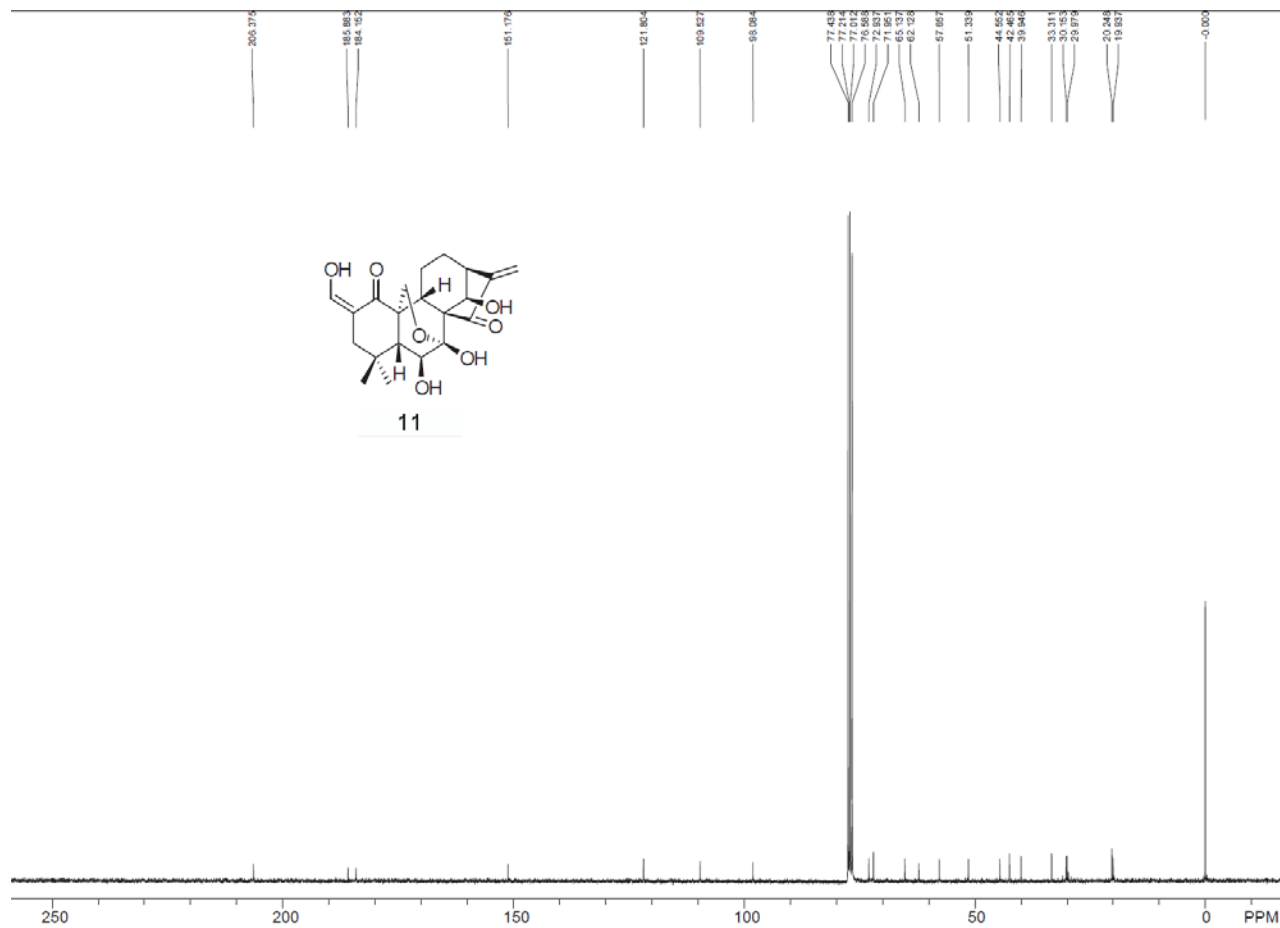

|              |              |             |              |         |  |                                             |
|--------------|--------------|-------------|--------------|---------|--|---------------------------------------------|
| spect. CDCl3 |              |             |              |         |  | USER: nmr -- DATE: Mon Jul 16 14:36:50 2012 |
| F1: 75.480   | SW1: 29762   |             | OF1: 12577.9 |         |  | PTS1d: 32768                                |
| EX: zgpg30   | PW: 8.0 usec | PD: 2.0 sec | NA: 3985     | LB: 0.0 |  | WinNuts - \$pdata                           |

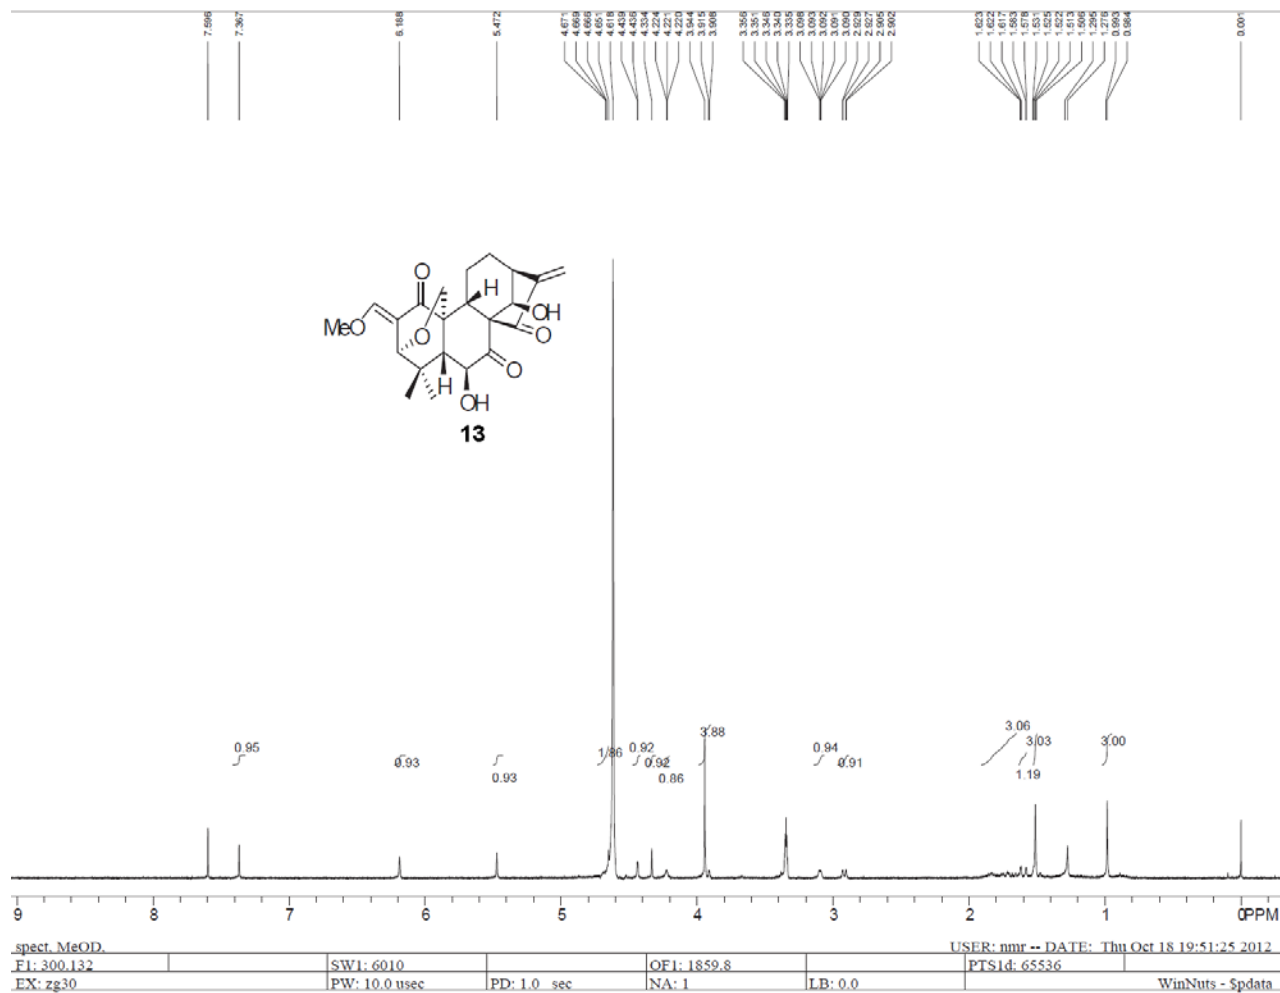



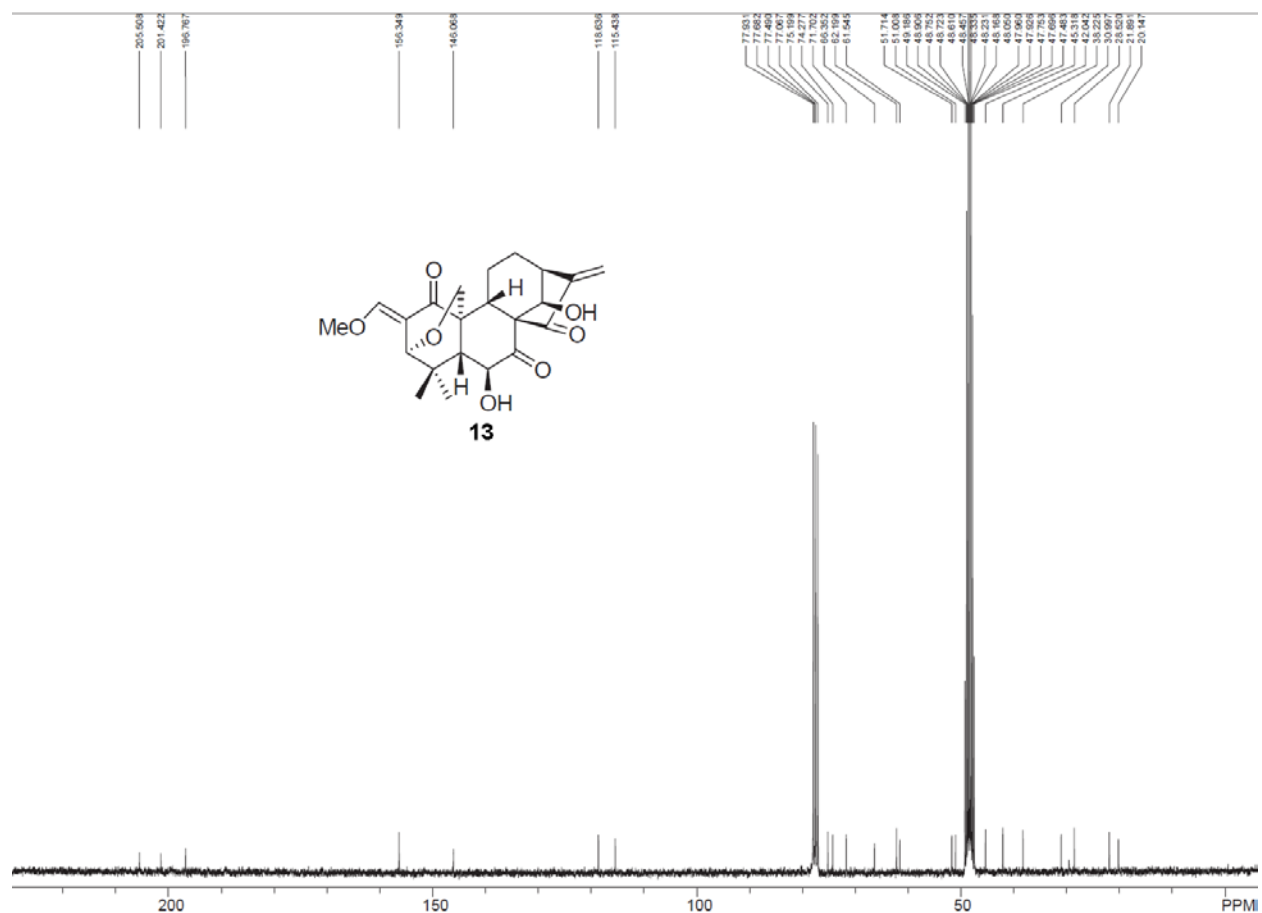

|              |  |              |             |              |         |                                              |
|--------------|--|--------------|-------------|--------------|---------|----------------------------------------------|
| spect. MeOD. |  |              |             |              |         | USER: nmr -- DATE: Thu Oct 18 22:55:31 2012. |
| F1: 75.480   |  | SW1: 29762   |             | OF1: 12579.6 |         | PTS1d: 32768                                 |
| EX: zgpg30   |  | PW: 8.0 usec | PD: 2.0 sec | NA: 5840     | LB: 0.0 | WinNuts - Spdata                             |

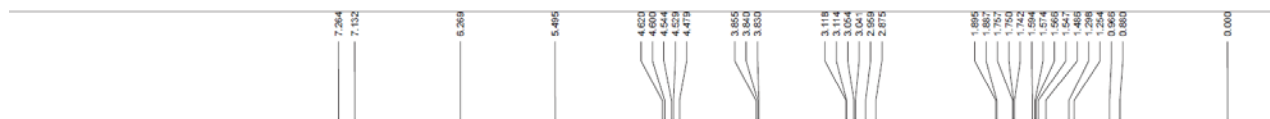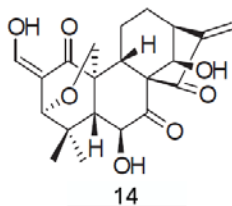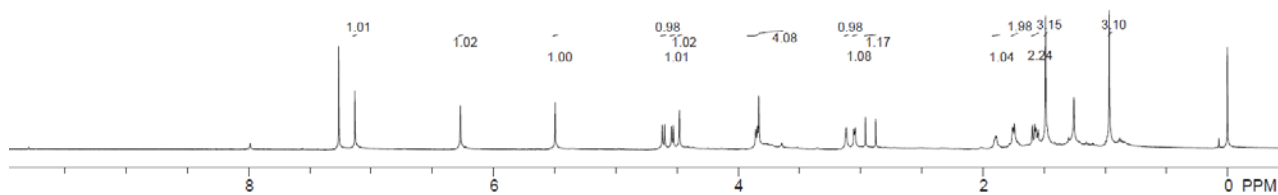

|                           |              |             |                                              |         |              |                  |
|---------------------------|--------------|-------------|----------------------------------------------|---------|--------------|------------------|
| spectr. CDCl <sub>3</sub> |              |             | USER: zhou -- DATE: Thu Oct 25 19:58:49 2012 |         |              |                  |
| Fl: 599.378               | SW1: 12336   |             | OF1: 2981.4                                  |         | PTS1d: 65536 |                  |
| EX: zg30                  | PW: 8.0 usec | PD: 1.0 sec | NA: 1                                        | LB: 0.0 |              | WinNuts - Spdata |

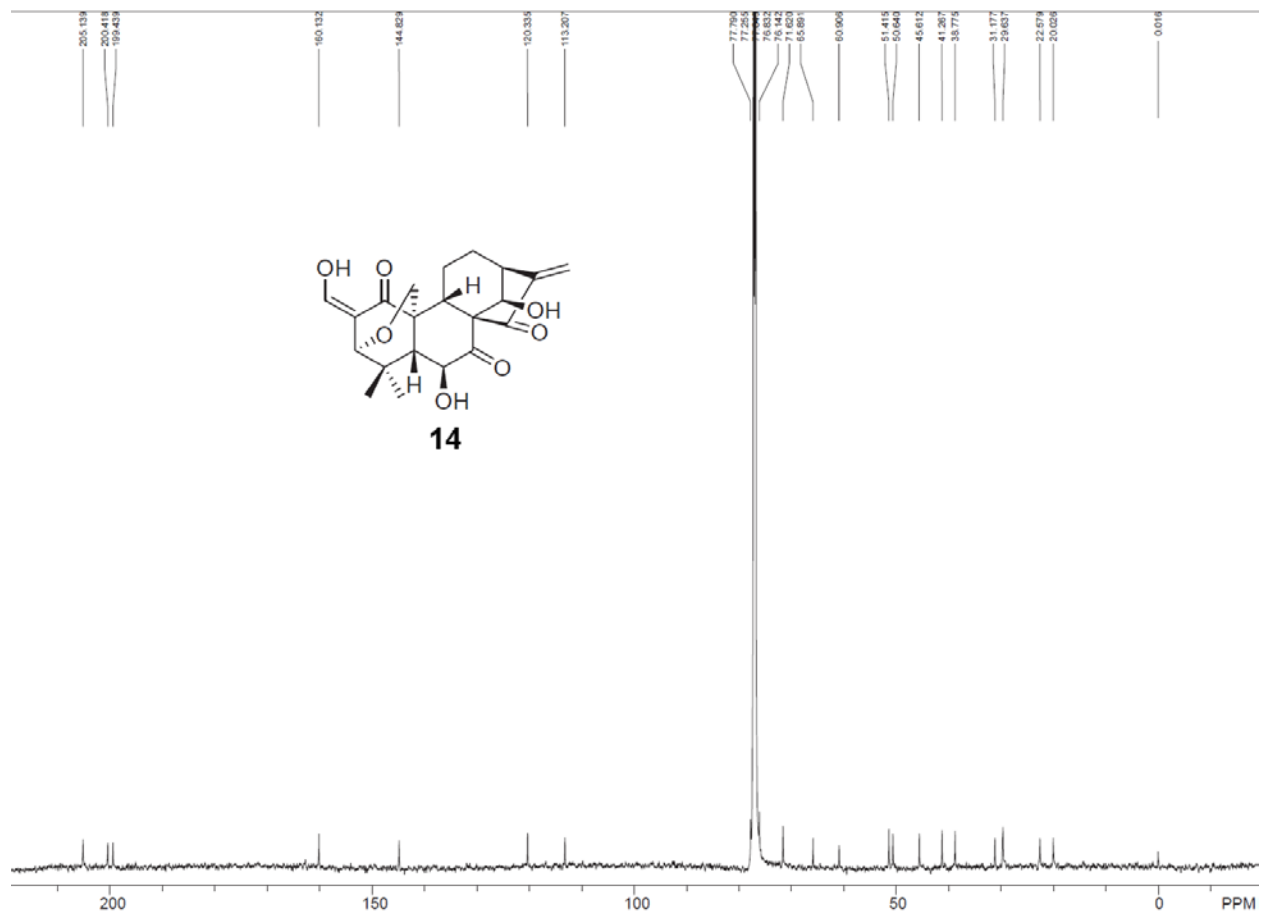

spect\_CDCl3  
 F1: 150.728  
 EX: zgig30

|               |              |                  |
|---------------|--------------|------------------|
| SW1: 36058    | OF1: 15074.2 | PTSD: 32768      |
| PW: 12.0 usec | NA: 398      | LB: 0.0          |
| PD: 1.5 sec   |              | WinNuts - Spdata |

USER: zhou -- DATE: Thu Oct 25 20:08:33 2012

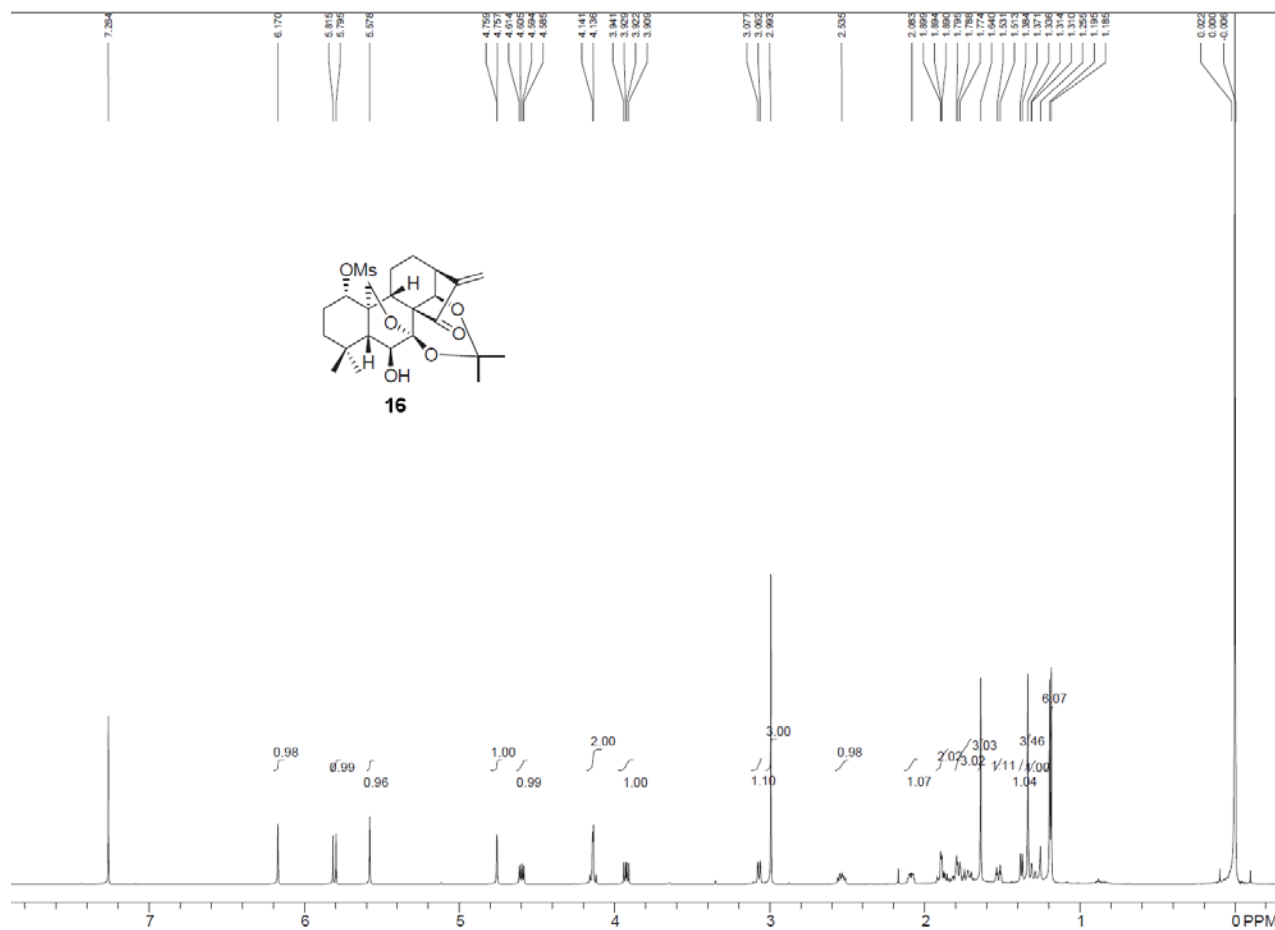

|                          |              |             |                                              |
|--------------------------|--------------|-------------|----------------------------------------------|
| spect. CDCl <sub>3</sub> |              |             | USER: zhou -- DATE: Thu Dec 13 20:23:50 2012 |
| F1: 599.378              | SW1: 12336   | OF1: 2980.7 | PTS1d: 65536                                 |
| EX: zg                   | PW: 8.0 usec | PD: 1.0 sec | NA: 1                                        |
|                          |              | LB: 0.0     | WinNuts - \$pdata                            |

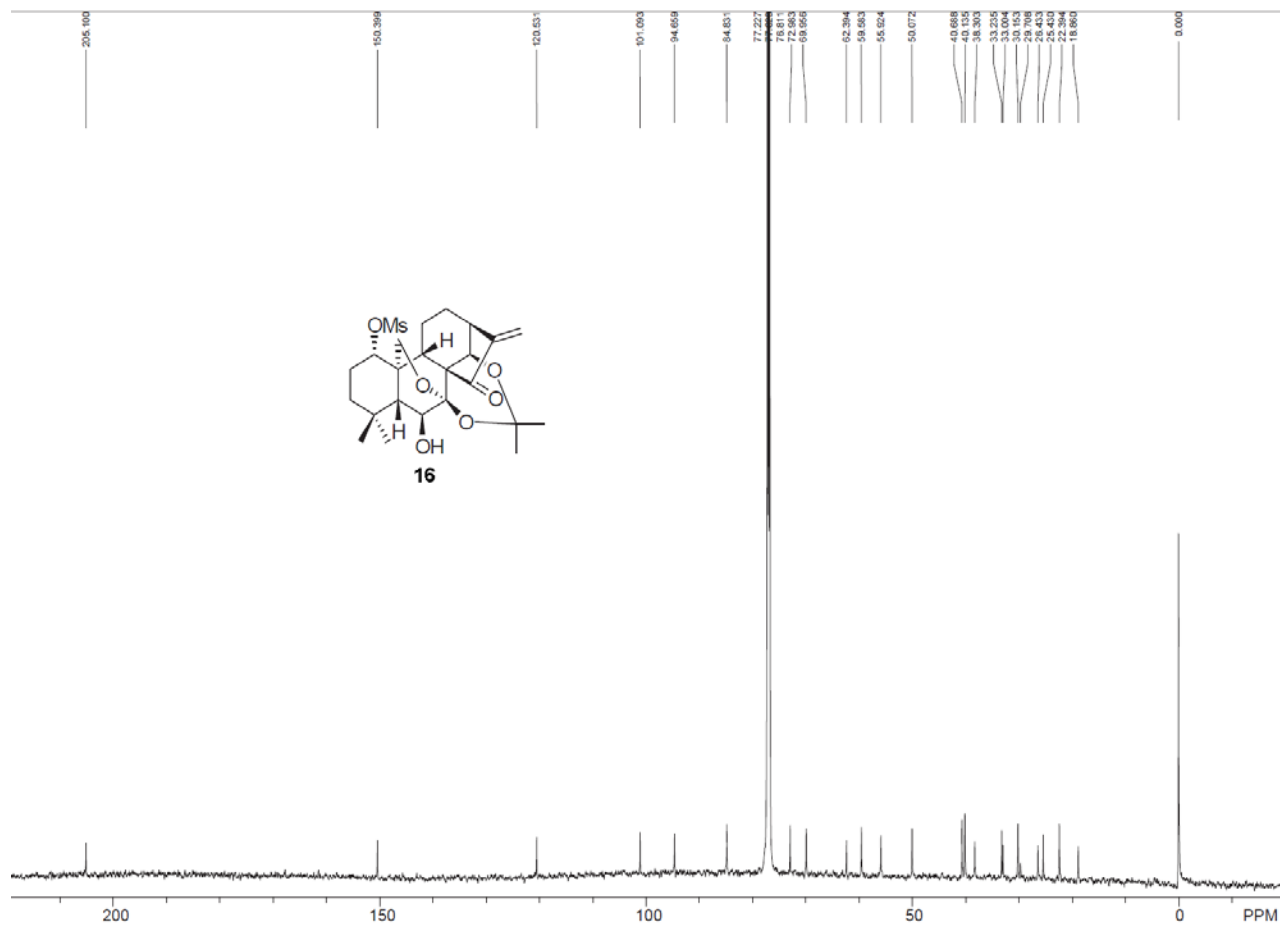

|               |               |             |              |         |                                              |
|---------------|---------------|-------------|--------------|---------|----------------------------------------------|
| spect. CDCl3. |               |             |              |         | USER: zhou -- DATE: Thu Dec 13 20:29:20 2012 |
| F1: 150.728   | SW1: 36058    |             | OF1: 15071.9 |         | PTS1d: 32768                                 |
| EX: zgig30    | PW: 12.0 usec | PD: 1.5 sec | NA: 183      | LB: 0.0 | WinNuts - Spdata                             |

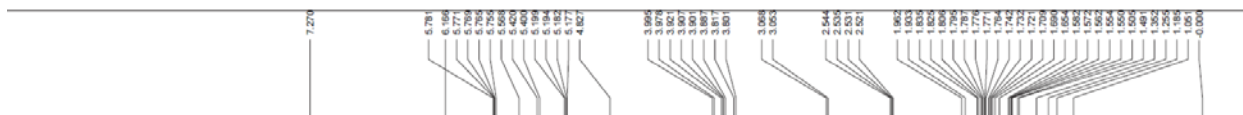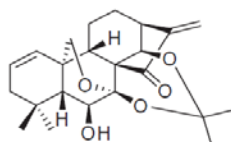

17

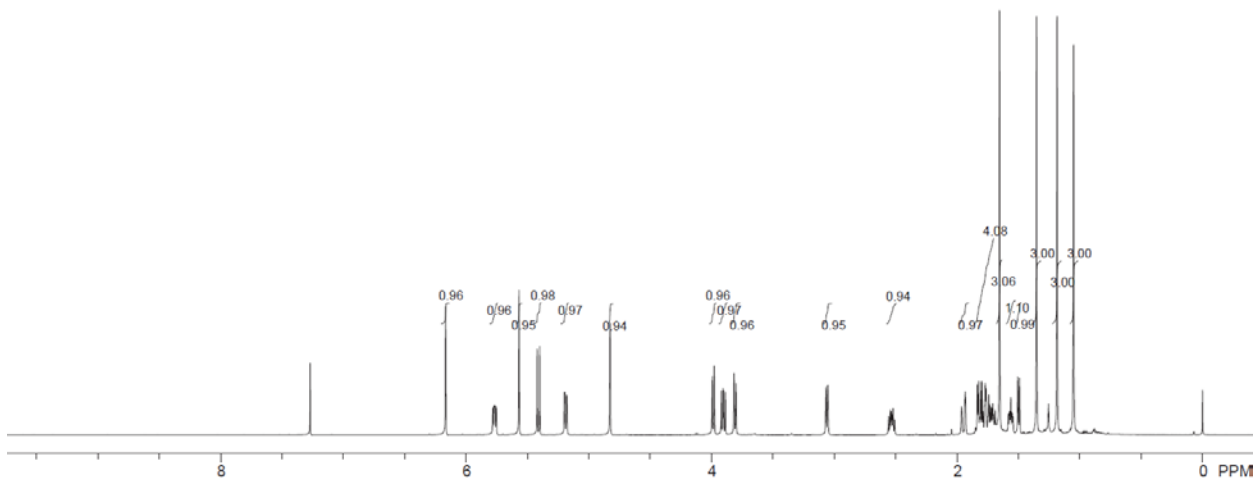

|                           |              |                                              |                   |
|---------------------------|--------------|----------------------------------------------|-------------------|
| spectr. CDCl <sub>3</sub> |              | USER: zhou -- DATE: Thu Jul 05 21:06:02 2012 |                   |
| F1: 599.378               | SW1: 12336   | OF1: 2985.1                                  | PTS1d: 65536      |
| EX: zg30                  | PW: 8.0 usec | PD: 1.0 sec                                  | NA: 1             |
|                           |              | LB: 0.0                                      | WinNuts - \$pdata |

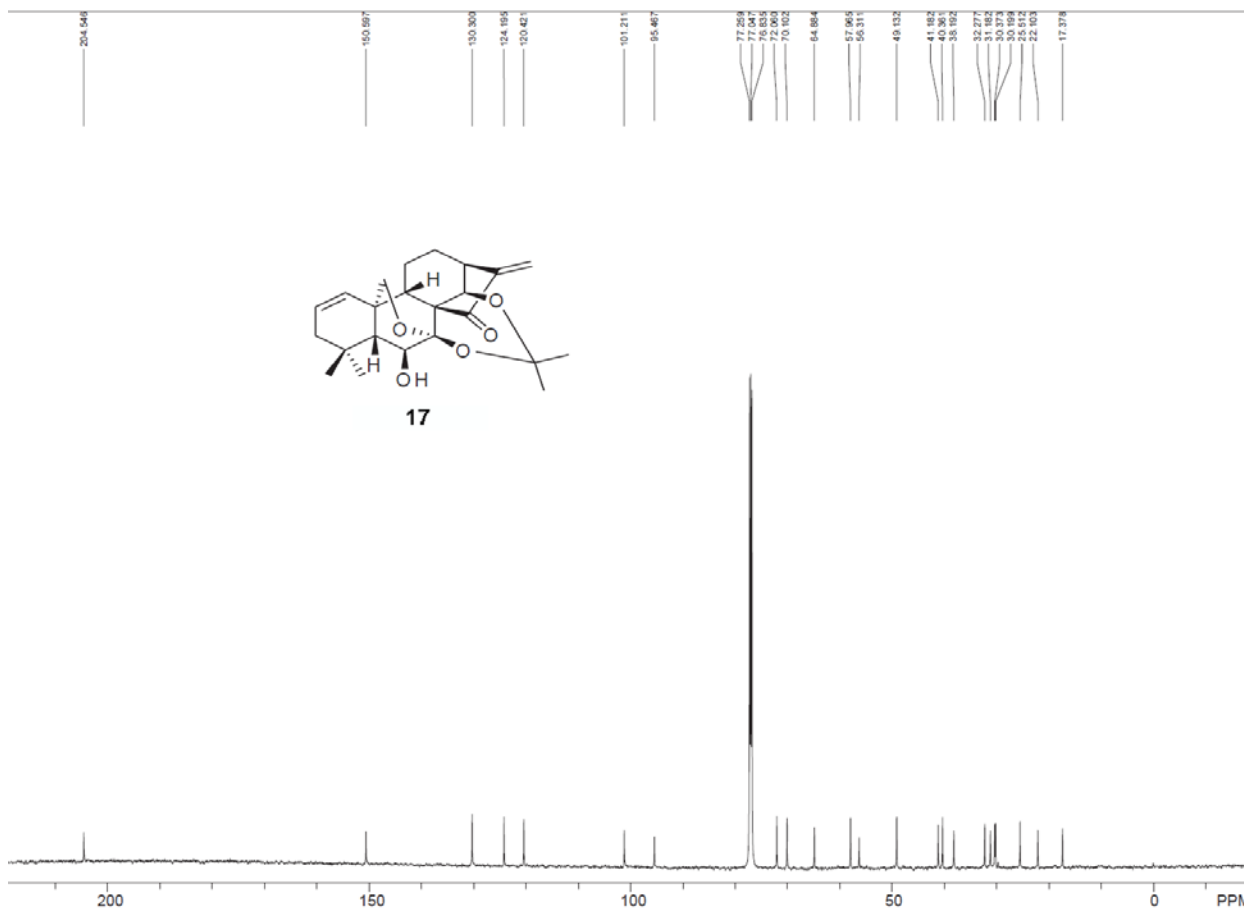

|              |               |              |                                              |         |                  |  |
|--------------|---------------|--------------|----------------------------------------------|---------|------------------|--|
| spectr_CDCl3 |               |              | USER: zhou -- DATE: Thu Jul 05 21:08:38 2012 |         |                  |  |
| E1: 150.728  | SW1: 3.6058   | OF1: 15074.2 | PTS1d: 32768                                 |         |                  |  |
| EX: zgig30   | PW: 12.0 usec | PD: 1.5 sec  | NA: 86                                       | LB: 0.0 | WinNuts - Spdata |  |

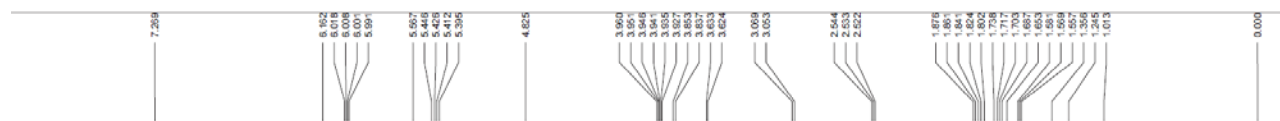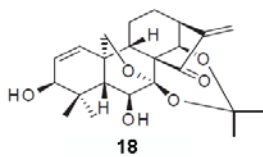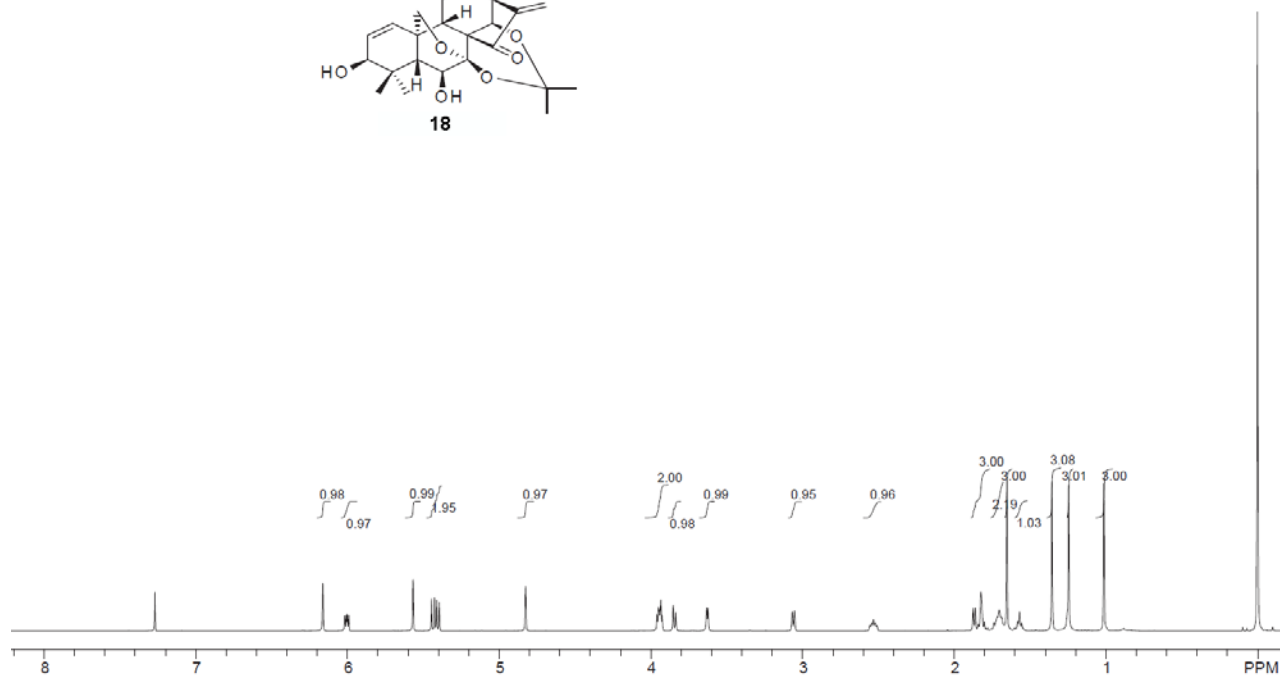

|              |              |             |             |         |                                              |
|--------------|--------------|-------------|-------------|---------|----------------------------------------------|
| spectr_CDCl3 |              |             |             |         | USER: zhou -- DATE: Thu Jul 19 17:03:13 2012 |
| F1: 599.378  | SW1: 12336   |             | OF1: 2984.6 |         | PTS1d: 65536                                 |
| EX: zg30     | PW: 8.0 usec | PD: 1.0 sec | NA: 1       | LB: 0.0 | WinNuts - Spdata                             |



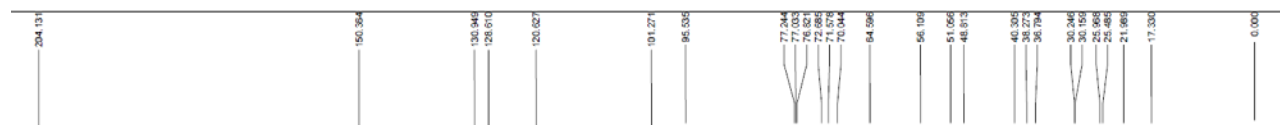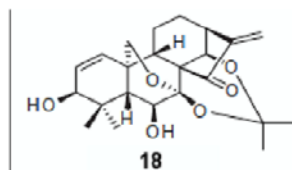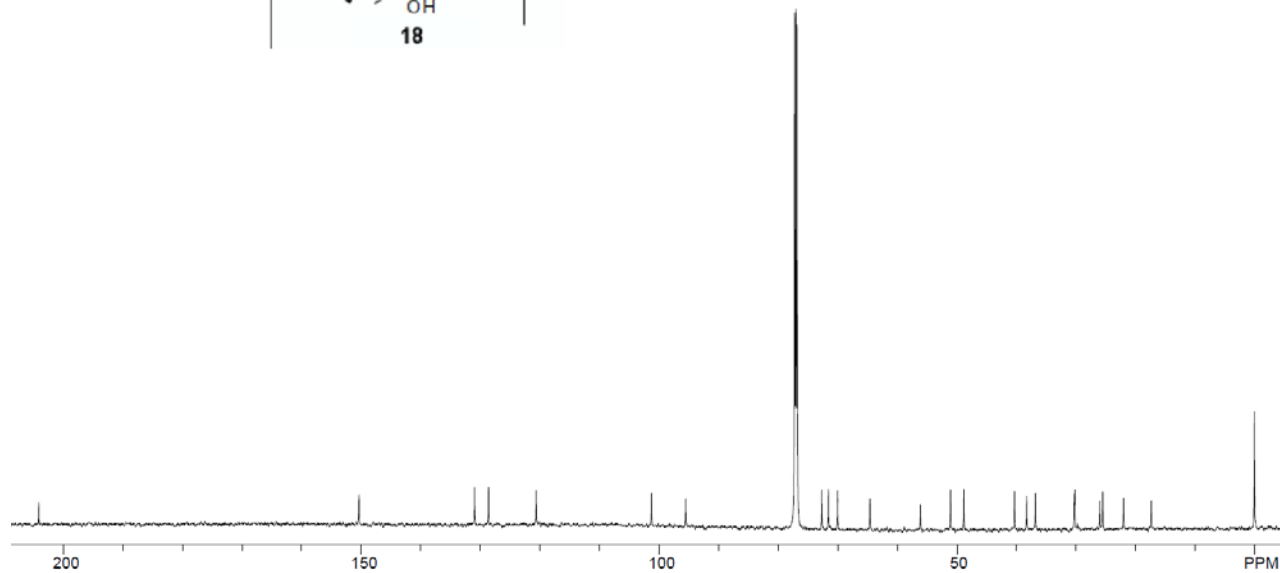

|                           |               |             |                                              |         |              |                  |
|---------------------------|---------------|-------------|----------------------------------------------|---------|--------------|------------------|
| spectr. CDCl <sub>3</sub> |               |             | USER: zhou -- DATE: Thu Jul 19 17:05:41 2012 |         |              |                  |
| Fl: 150.728               | SW1: 36058    |             | OF1: 15071.7                                 |         | PTS1d: 32768 |                  |
| EX: zgig30                | PW: 12.0 usec | PD: 1.5 sec | NA: 55                                       | LB: 0.0 |              | WinNuts - Spdata |

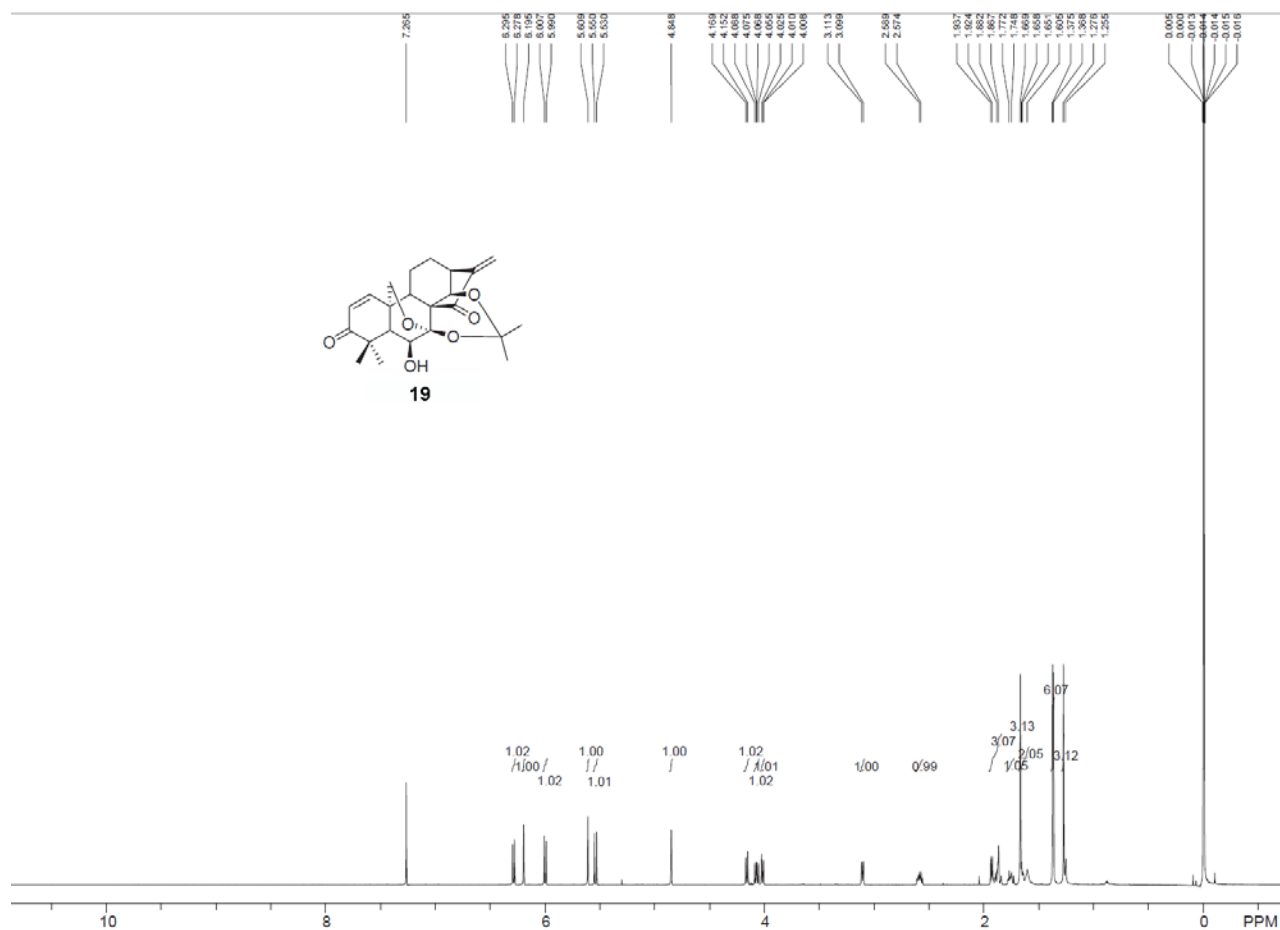

spect\_CDCl3  
 F1: 599.378  
 EX: zg30  
 SW1: 12336  
 PW: 8.0 tusec  
 PD: 1.0 sec  
 OF1: 2981.9  
 NA: 1  
 LB: 0.0  
 USER: zhou -- DATE: Thu Jul 19 17:12:27 2012  
 PTS1d: 65536  
 WinNuts - Spdata

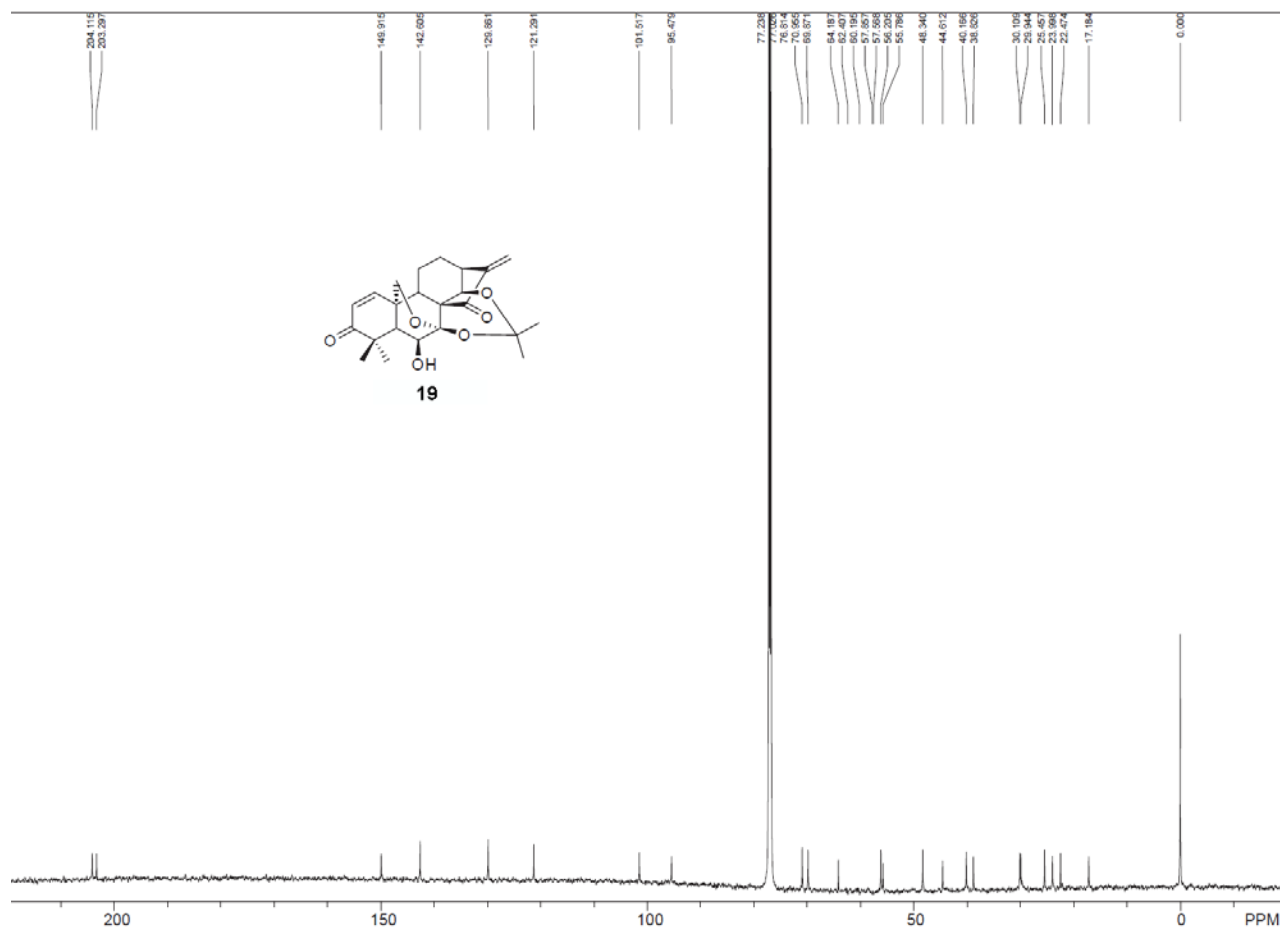

|              |  |               |             |              |         |                                              |
|--------------|--|---------------|-------------|--------------|---------|----------------------------------------------|
| spectr_CDC13 |  |               |             |              |         | USER: zhou -- DATE: Thu Jul 19 17:15:30 2012 |
| F1: 150.728  |  | SW1: 36058    |             | OF1: 15073.0 |         | PTS1d: 32768                                 |
| EX: zgig30   |  | PW: 12.0 usec | PD: 1.5 sec | NA: 121      | LB: 0.0 | WinNuts - Spdata                             |

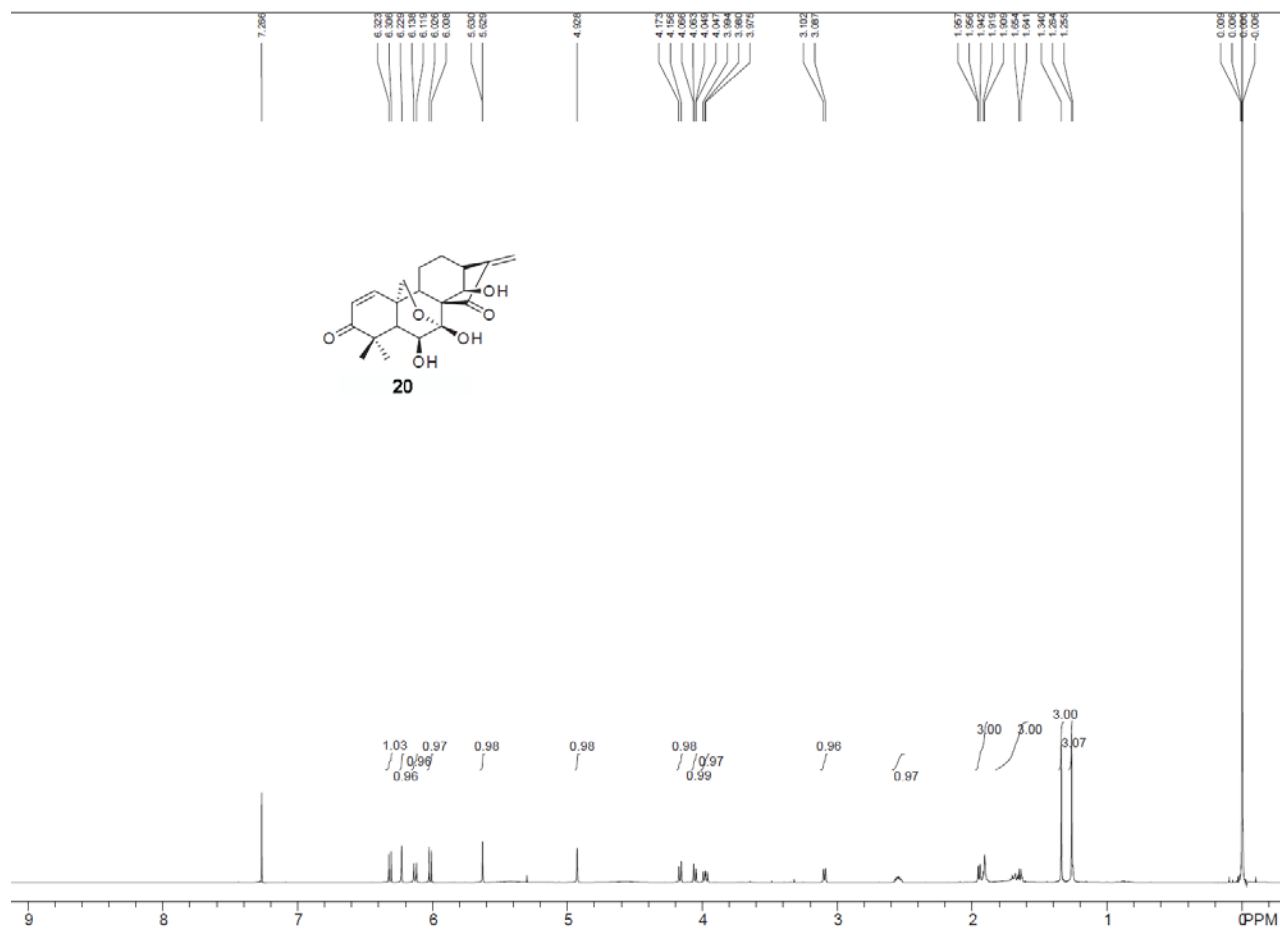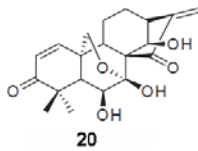

|              |              |             |             |         |                                              |
|--------------|--------------|-------------|-------------|---------|----------------------------------------------|
| spectr_CDCl3 |              |             |             |         | USER: zhou -- DATE: Thu Jul 26 17:51:47 2012 |
| F1: 599.378  | SW1: 12336   |             | OF1: 2982.9 |         | PTS1d: 65536                                 |
| EX: zg30     | PW: 8.0 usec | PD: 1.0 sec | NA: 16      | LB: 0.0 | WinNuts - Spdata                             |

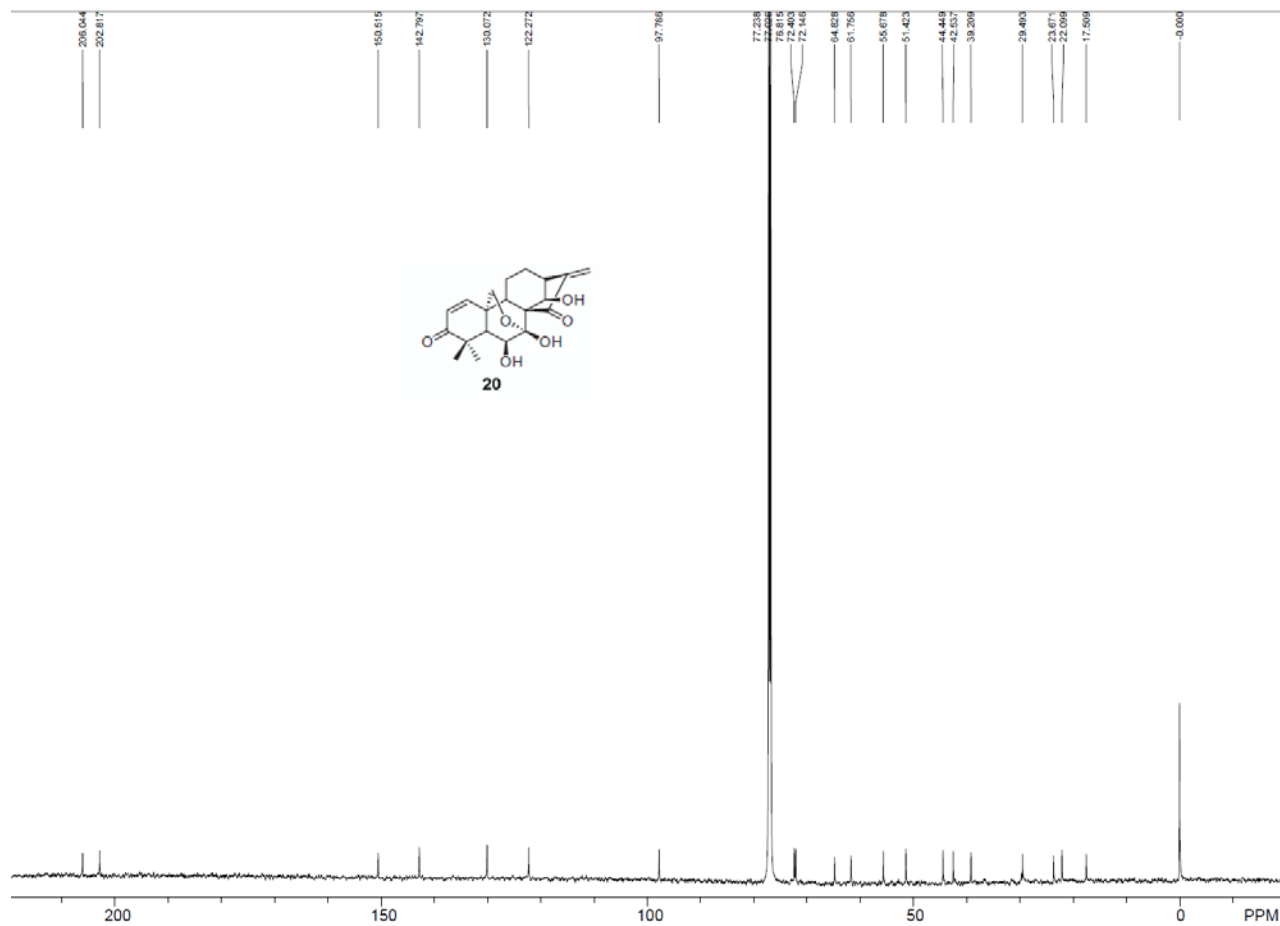

|               |               |             |              |         |  |                                              |
|---------------|---------------|-------------|--------------|---------|--|----------------------------------------------|
| spect. CDCl3. |               |             |              |         |  | USER: zhou -- DATE: Thu Jul 26 17:54:34 2012 |
| F1: 150.728   | SW1: 36058    |             | OF1: 15072.2 |         |  | PTS1d: 32768                                 |
| EX: zgig30    | PW: 12.0 usec | PD: 1.5 sec | NA: 76       | LB: 0.0 |  | WinNuts - Spdata                             |
